# Supplementary material
Source: ML conference proceedings conference paper supplement (https://proceedings.mlr.press/v28/pareek13.html)
Supplement: Supplementary file 1 [file pareek13-supp.zip]

# Human Boosting Appendix

## 1 Proof of Theorem 1

By the  $\beta$ -strong-smoothness of  $\mathcal{R}_{emp}[f]$ ,

$$\mathcal{R}_{emp}[f_{t+1}] \leq \mathcal{R}_{emp}[f_t] + \langle \nabla \mathcal{R}_{emp}[f_t], f_{t+1} - f_t \rangle + \beta/2 \|f_{t+1} - f_t\|_2^2.$$

Denoting  $\hat{\nabla}_t := \nabla \mathcal{R}_{emp}[f_t]$ , and  $\nabla_t := \mathbb{E}[\hat{\nabla}_t]$ , and noting that  $f_{t+1} = f_t - \frac{1}{\beta} \frac{\langle \hat{\nabla}_t, h_t \rangle}{\|h_t\|^2} h_t$ , where  $h_t \in \arg \max_{h \in H} \langle \hat{\nabla}_t, h \rangle / \|h\|$ , we obtain,

$$\mathcal{R}_{emp}[f_{t+1}] \leq \mathcal{R}_{emp}[f_t] - \frac{1}{\beta \|h_t\|^2} \langle \hat{\nabla}_t, h_t \rangle \langle \nabla_t, h_t \rangle + \frac{1}{2\beta \|h_t\|^2} [\langle \hat{\nabla}_t, h_t \rangle]^2.$$

Denote  $e_t := \hat{\nabla}_t - \nabla_t$ , we obtain,

$$\begin{aligned} \mathcal{R}_{emp}[f_{t+1}] - \mathcal{R}_{emp}[f_t] &\leq -\frac{1}{2\beta \|h_t\|^2} [\langle \hat{\nabla}_t, h_t \rangle]^2 + \frac{1}{\beta \|h_t\|^2} \langle e_t, h_t \rangle \langle \hat{\nabla}_t, h_t \rangle \\ &\leq -\frac{\gamma}{2\beta} \|\hat{\nabla}_t\|^2 + \|e_t\| \|\hat{\nabla}_t\|, \end{aligned}$$

where we use the edge condition,  $\langle \hat{\nabla}_t, h_t \rangle \geq \gamma \|\hat{\nabla}_t\| \|h_t\|$ . Using the inequality that  $\|\hat{\nabla}_t\|^2 \geq \frac{1}{2} \|\nabla_t\|^2 - c_t^2$ , we get

$$\beta(\mathcal{R}_{emp}[f_{t+1}] - \mathcal{R}_{emp}[f_t]) \leq -\frac{\gamma}{4} \|\nabla_t\|^2 + (1 + \gamma) \|e_t\|^2 + \|e_t\| \|\nabla_t\|,$$

so that taking expectations on both sides, we get

$$\beta \mathbb{E}[\mathcal{R}_{emp}[f_{t+1}] - \mathcal{R}_{emp}[f_t]] \leq -(\frac{\gamma}{4} - (\kappa^2 + \kappa(1 + \gamma/2))) \|\nabla_t\|^2,$$

where we used the variance bound  $\|e_t\| \leq \kappa \|\nabla_t\|$  as specified in the theorem.

Using the  $\alpha$ -strong-convexity of  $\mathcal{R}_{emp}[f]$ , we get,

$$\mathcal{R}_{emp}[f^*] - \mathcal{R}_{emp}[f_t] \geq -\frac{1}{2\alpha} \|\hat{\nabla}_t\|^2.$$

Substituting the bound for  $\|\hat{\nabla}_t\|^2$  in the previous inequality, we get,

$$\begin{aligned} \mathbb{E}[\mathcal{R}_{emp}[f_{t+1}]] - \mathcal{R}_{emp}[f^*] &\leq \mathbb{E}[\mathcal{R}_{emp}[f_t]] - \mathcal{R}_{emp}[f^*] \\ &\quad - 2\alpha/\beta (\frac{\gamma}{4} - (\kappa^2 + \kappa(1 + \gamma/2))) \mathbb{E}[\mathcal{R}_{emp}[f_t]] - \mathcal{R}_{emp}[f^*], \end{aligned}$$

from which the theorem follows.
